# Supplementary material for: Unraveling the mode of binding of the anticancer drug topotecan with dsDNA
Source: Royal Society of Chemistry journal article supplement (doi:10.1039/c3ra42462f), 2013-10-09
Supplement: c3ra42462f.pdf [file c3ra42462f.pdf]

## Supporting information

# **Unraveling the mode of binding of the anticancer drug, topotecan with dsDNA**

Hrishikesh Joshi, Abhigyan Sengupta, Krishna Gavvala, and Partha Hazra\*

Department of Chemistry, Mendeleev Block, Indian Institute of Science Education and Research (IISER), Pune 411008, Maharashtra, India.

---

\* Corresponding author. E-mail: [p.hazra@iiserpune.ac.in](mailto:p.hazra@iiserpune.ac.in). Tel.: +91-20-2590-8077; Fax: +91-20-2589 9790.

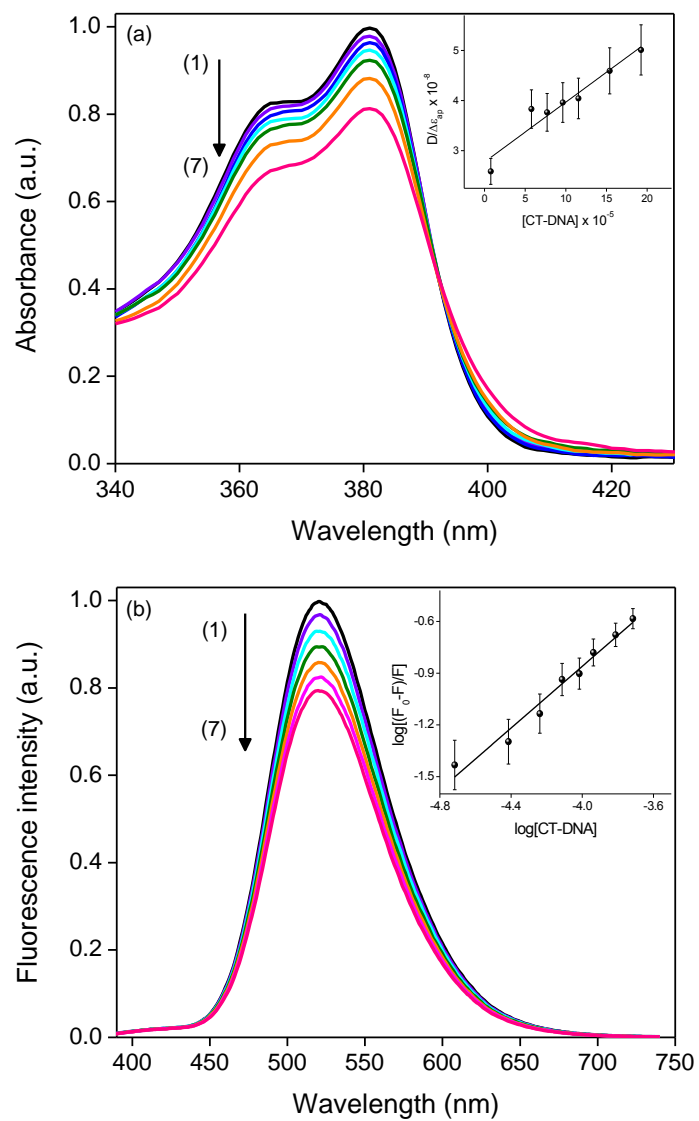

**Figure S1.** (a) Absorption and (b) fluorescence spectra of TPT (20 μM) in absence and presence of CT-DNA. 1→7 represents CT-DNA concentrations 0, 5, 10, 20, 40, 80 and 100 μM, respectively.

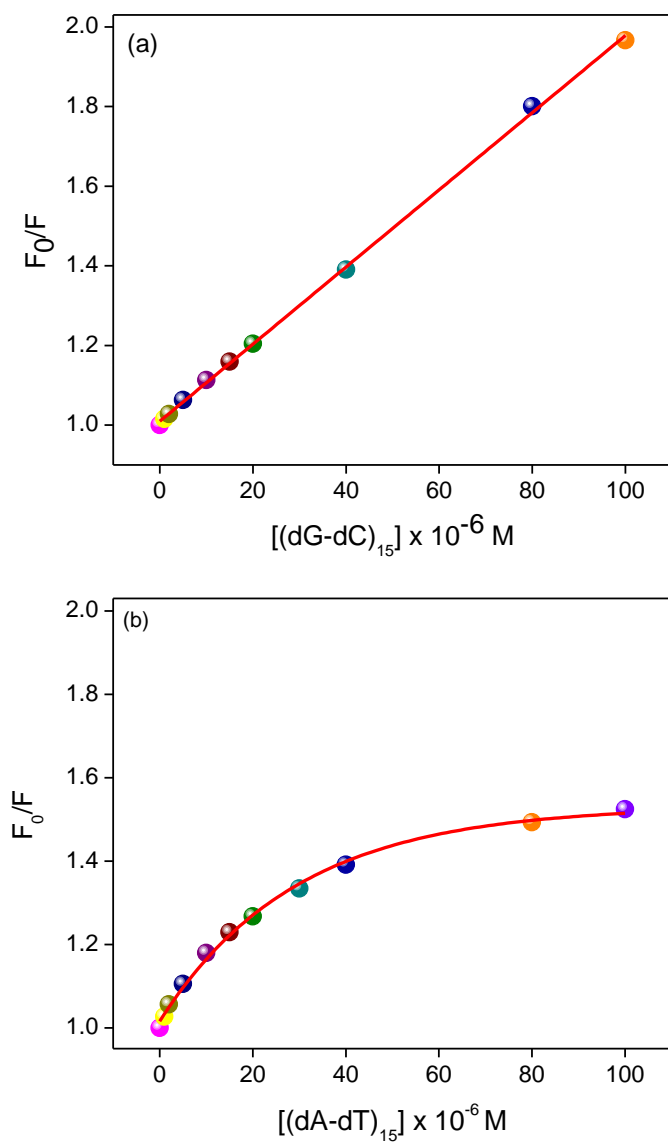

**Figure S2.** Stern-Volmer plots for TPT quenching in presence of (a)  $(dG-dC)_{15}$  and (b)  $(dA-dT)_{15}$ .

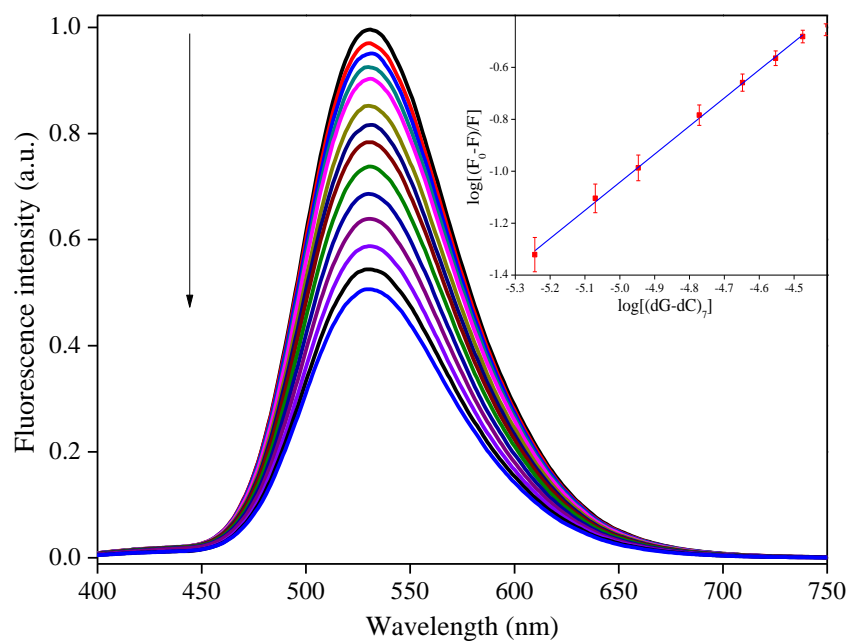

**Figure S3.** Fluorescence emission spectra of TPT (20 μM) in presence of (dG-dC)<sub>7</sub>. Arrow represents DNA concentrations from 0 to 100 μM. Inset shows double logarithmic plot for the determination of binding constant.

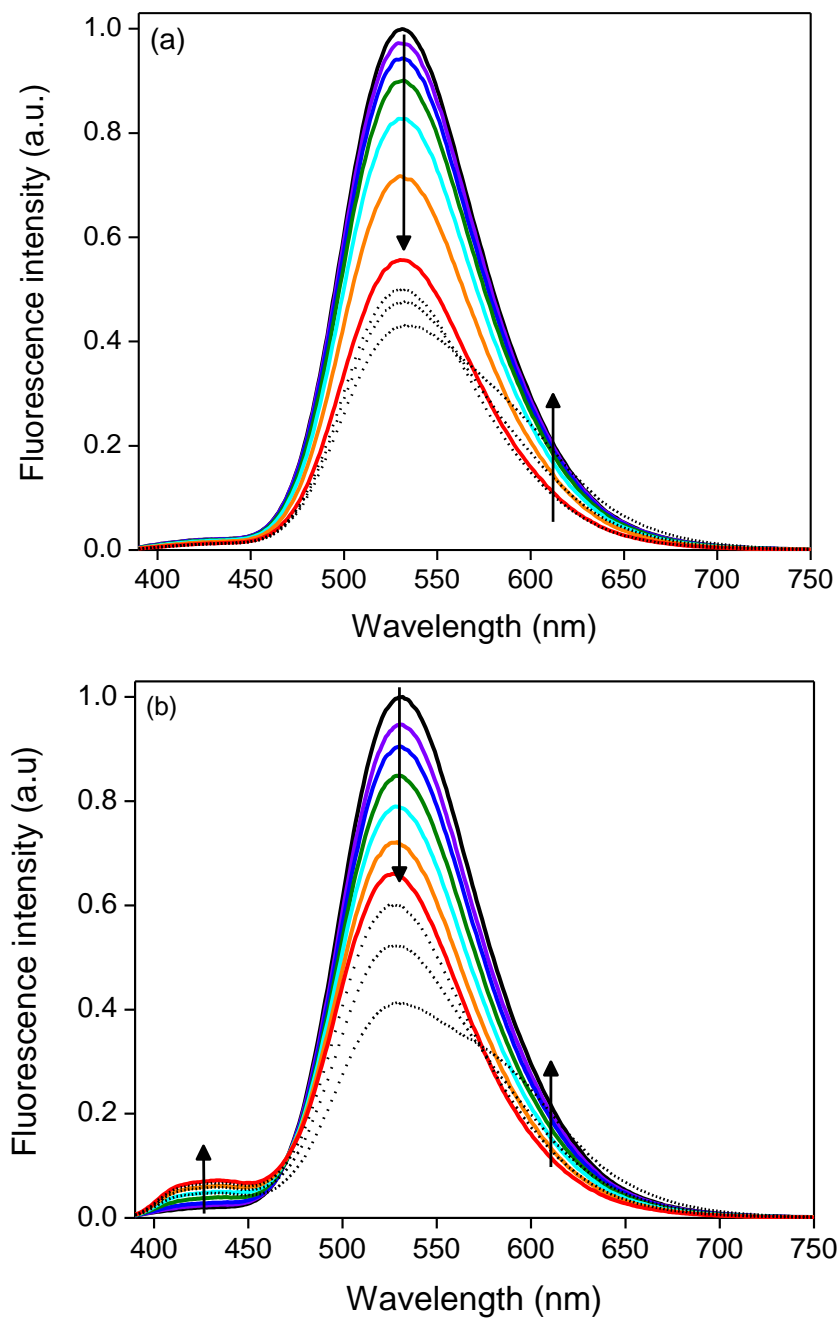

**Figure S4.** EtBr displacement assay experiment. TPT fluorescence quenching in presence of (a)  $(dG-dC)_{15}$  and (b)  $(dA-dT)_{15}$  is shown by downward arrow. Emission profile changes after EtBr titration are shown by black dotted lines and upward arrow.

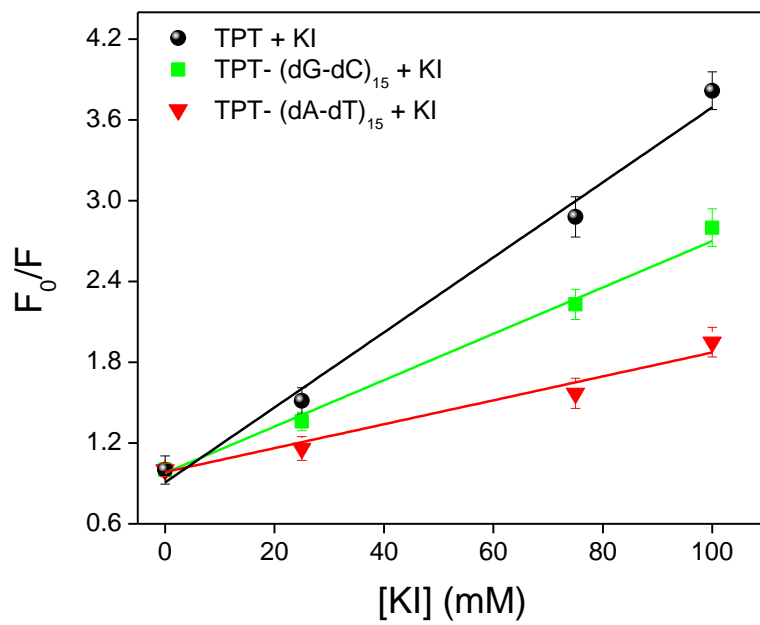

**Figure S5.** KI induced fluorescence quenching of TPT in absence and presence of DNA.

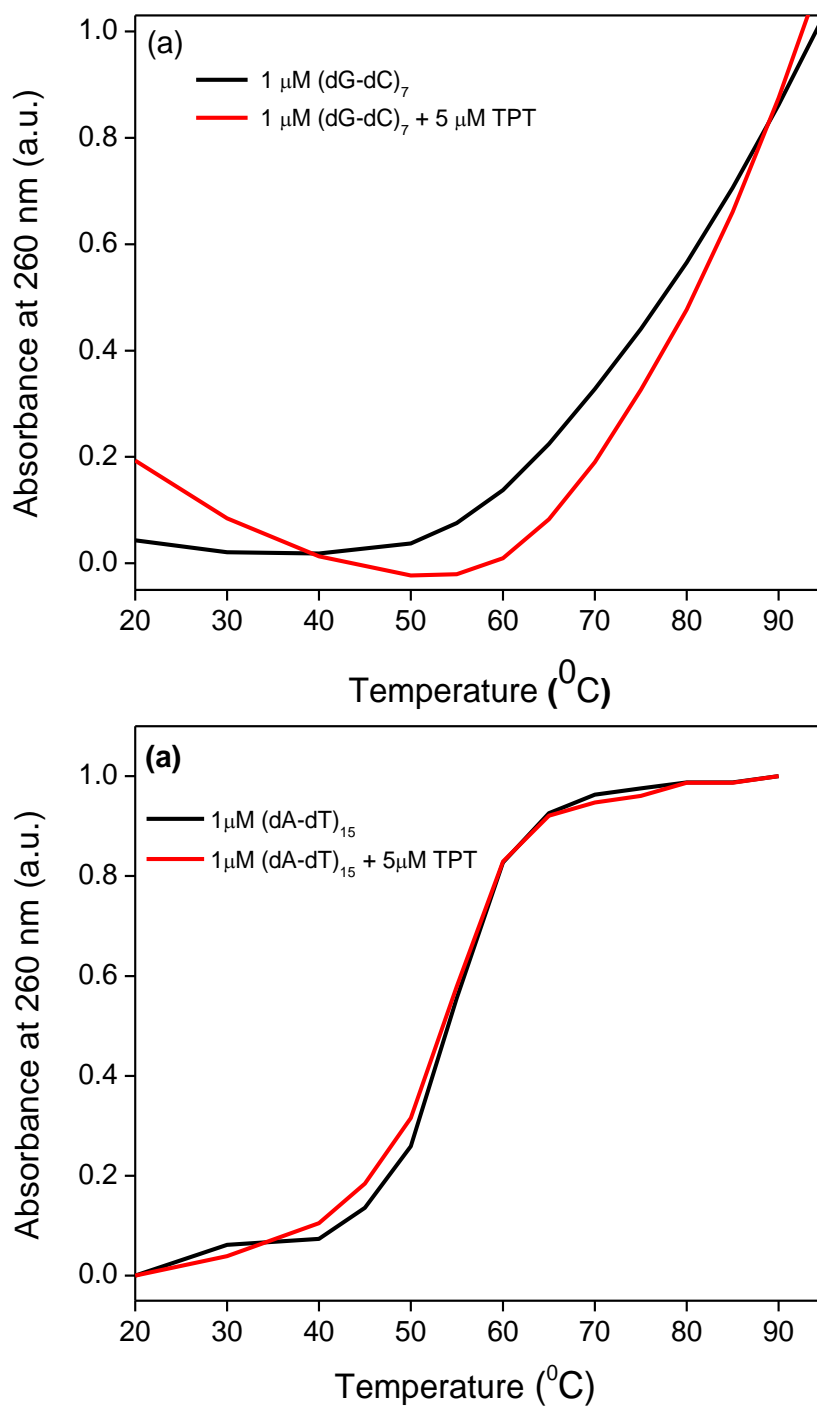

**Figure S6.** Thermal melting profiles are shown for (a) (dG-dC)<sub>7</sub> and (b) (dA-dT)<sub>15</sub> in presence and absence of TPT.

**Note S1:** As the melting temperature of (dG-dC)<sub>15</sub>, which we have used in our study, is quite high (~85°C), we used shorter ((dG-dC)<sub>7</sub>) sequence for melting study.

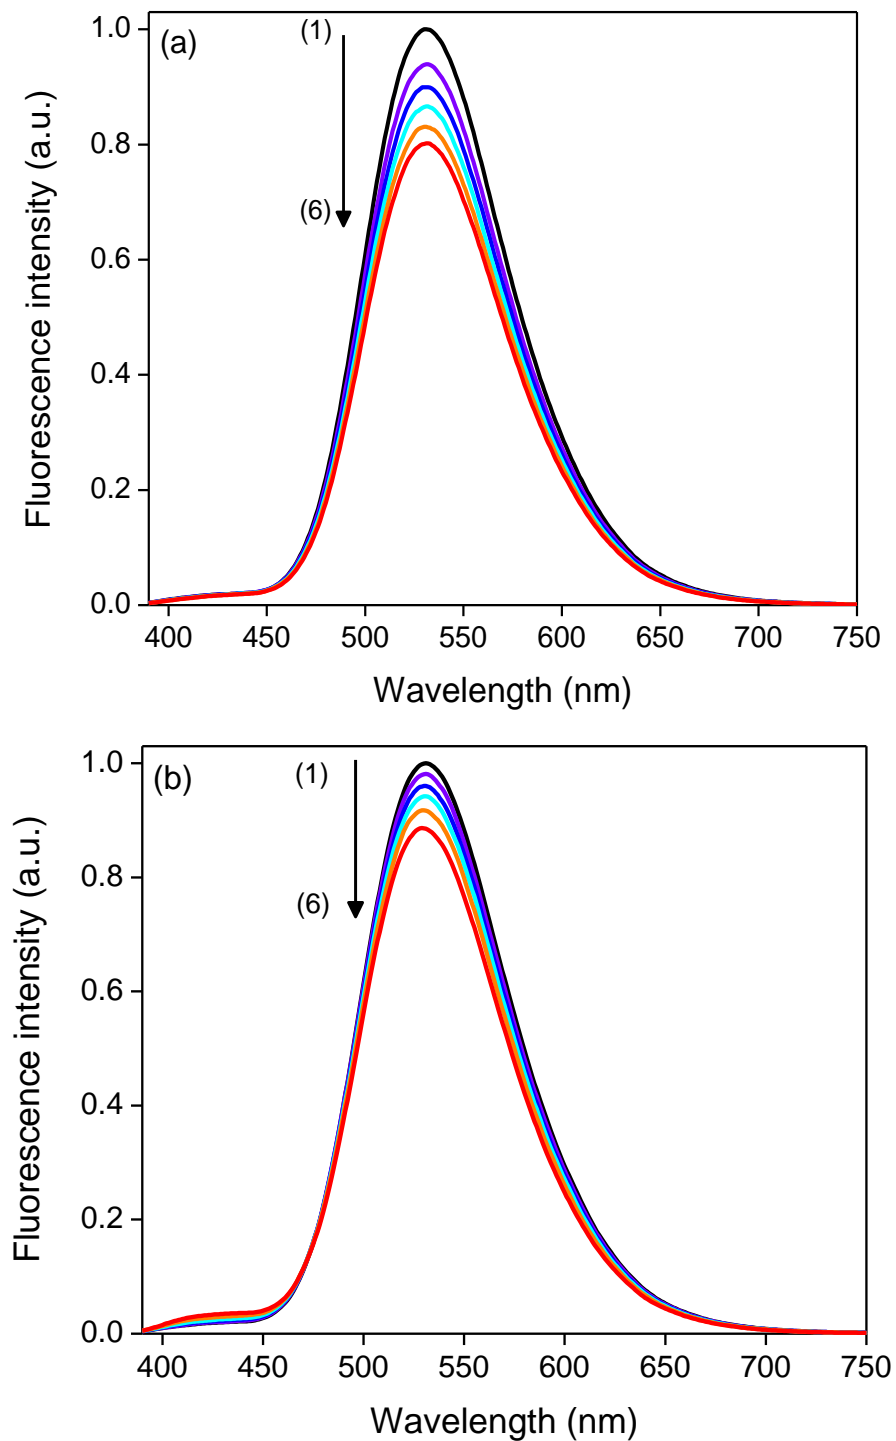

**Figure S7.** Relative intensity changes of TPT at higher NaCl concentration (100 mM) with successive additions of (a) (dG-dC)<sub>15</sub> and (b) (dA-dT)<sub>15</sub> DNA. 1→6 represents concentrations of DNA= 0, 20, 40, 60, 80 and 100 μM.



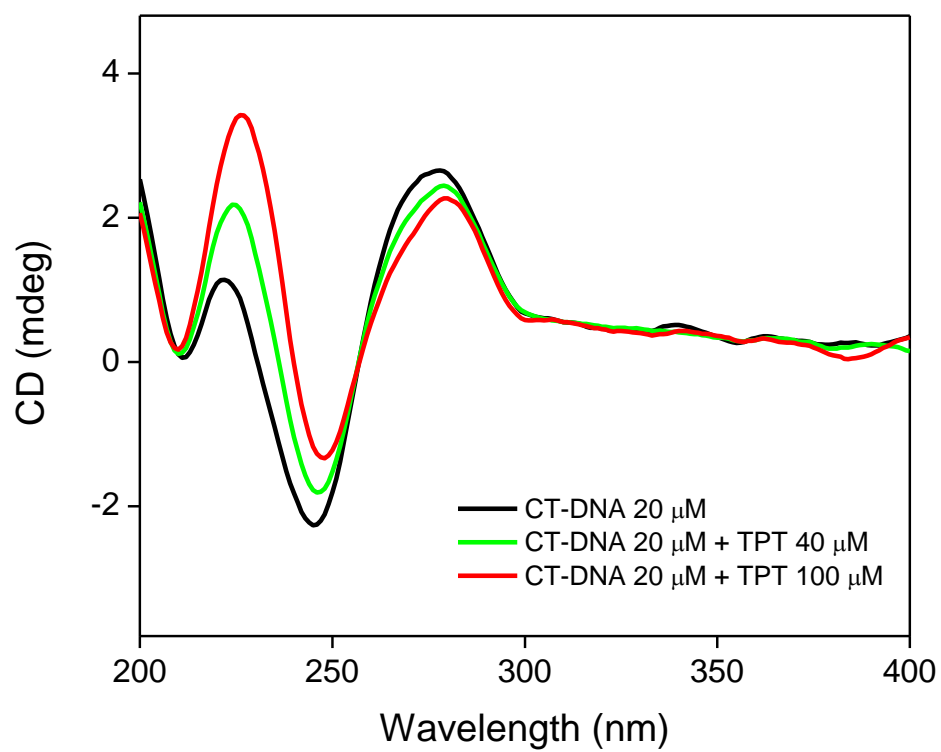

**Figure S8.** Circular dichroism profiles of CT-DNA in absence and presence of TPT.

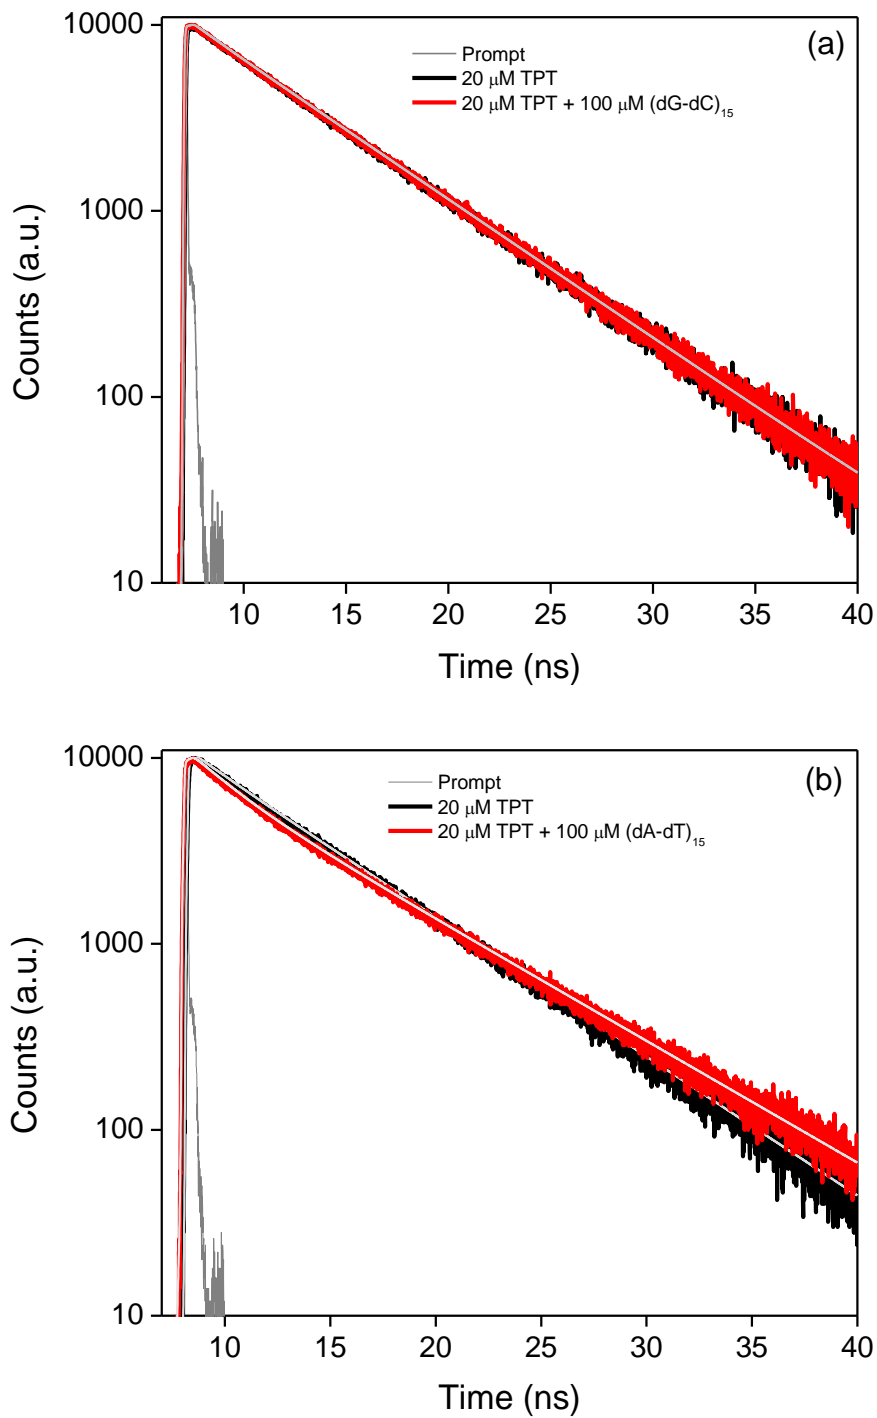

**Figure S9.** Lifetime decay profiles of free TPT and TPT bound to 100 μM (a) (dG-dC)<sub>15</sub> and (b) (dA-dT)<sub>15</sub> DNA collected at 530 nm ( $\lambda_{\text{ex}} = 375$  nm).

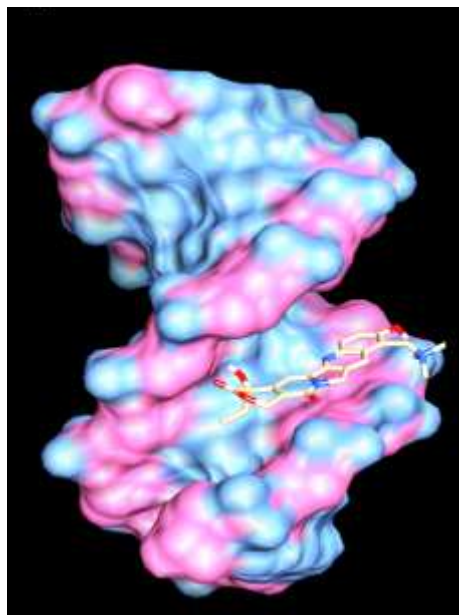

**Figure S10.** Molecular docking structures of C-TPT bound with dsDNA of d(CCGCTAGCGG).
